# Supplementary material for: Genetic polymorphism of ESR1 rs2881766 increases breast cancer risk in Korean women
Source: Springer Nature journal article supplement (doi:10.1007/s00432-014-1849-2), 2014-10-16
Supplement: MOESM1 [file 8520018]

| Supplementary Table 1. Genetic polymorphisms of estrogen metabolizing enzymes and estrogen receptor genes according to age groups | | | | | | | | | | | | | | | | | | | | | | | | | |
| --- | --- | --- | --- | --- | --- | --- | --- | --- | --- | --- | --- | --- | --- | --- | --- | --- | --- | --- | --- | --- | --- | --- | --- | --- | --- |
| Gene | rs # |  |  |  | Premenopausal women | | | | | | | | | | | | | | |  | Postmenopausal women | | | | |
| Control | |  | < 35y | | | | |  | ≥35 y | | | | |  | AA1 | AB+BB1 |  |  | AA1 | AB+BB1 | AA1 | AB+BB1 |  |
| AA1 | AB+BB1 |  | AA1 | AB+BB1 | AA1 | AB+BB1 | *p* value |  | AA1 | AB+BB1 | AA1 | AB+BB1 | *p* value |  | *p* value |  | *p* value |
| % | |  | % | | OR (CI 95%)2 | |  |  | % | | OR (CI 95%)2 | |  |  | OR (CI 95%)2 | |  |  | % | | OR (CI 95%)2 | |  |
| ESR13 | rs851984 | 77.7 | 22.3 |  | 78.1 | 21.9 | 1.0(ref.) | 0.98(0.32-2.94) | 0.97 |  | 77.9 | 22.2 | 1.0(ref.) | 0.89(0.62-1.29) | 0.54 |  | 1.0(ref.) | 0.89(0.62-1.29) | 0.53 |  | 79.3 | 20.7 | 1.0(ref.) | 1.02(0.65-1.60) | 0.92 |
| ESR1 | rs851982 | 77.2 | 22.8 |  | 78.1 | 21.9 | 1.0(ref.) | 0.97(0.32-2.93) | 0.96 |  | 77.9 | 22.2 | 1.0(ref.) | 0.86(0.60-1.25) | 0.44 |  | 1.0(ref.) | 0.86(0.60-1.25) | 0.43 |  | 79.4 | 20.7 | 1.0(ref.) | 0.98(0.63-1.53) | 0.93 |
| ESR1 | rs2881766 | 36.7 | 63.3 |  | 26.6 | 73.4 | 1.0(ref.) | 3.13(1.05-9.27) | 0.04 |  | 32.5 | 67.5 | 1.0(ref.) | 1.38(0.99-1.92) | 0.05 |  | 1.0(ref.) | 1.38(0.997-1.92) | 0.05 |  | 27.5 | 72.5 | 1.0(ref.) | 1.62(1.08-2.42) | 0.02 |
| ESR1 | rs2077647 | 44.1 | 55.9 |  | 34.4 | 65.6 | 1.0(ref.) | 2.28(0.84-6.18) | 0.11 |  | 40.1 | 59.9 | 1.0(ref.) | 1.32(0.96-1.81) | 0.09 |  | 1.0(ref.) | 1.33(0.97-1.83) | 0.07 |  | 36.5 | 63.6 | 1.0(ref.) | 1.61(1.10-2.36) | 0.01 |
| ESR1 | rs9322331 | 96.2 | 3.9 |  | 93.8 | 6.3 | 1.0(ref.) | 2.44(0.35-16.9) | 0.37 |  | 95.6 | 4.4 | 1.0(ref.) | 0.95(0.43-2.07) | 0.89 |  | 1.0(ref.) | 0.98(0.46-2.12) | 0.96 |  | 94.2 | 5.8 | 1.0(ref.) | 1.25(0.54-2.86) | 0.61 |
| ESR1 | rs712221 | 33.1 | 66.9 |  | 26.6 | 73.4 | 1.0(ref.) | 3.80(1.18-12.3) | 0.03 |  | 30.0 | 70.0 | 1.0(ref.) | 1.22(0.87-1.70) | 0.25 |  | 1.0(ref.) | 1.24(0.89-1.73) | 0.20 |  | 31.0 | 69.0 | 1.0(ref.) | 1.07(0.72-1.59) | 0.75 |
| ESR1 | rs1801132 | 24.4 | 75.6 |  | 32.8 | 67.2 | 1.0(ref.) | 0.53(0.20-1.45) | 0.22 |  | 24.6 | 75.4 | 1.0(ref.) | 0.89(0.62-1.28) | 0.53 |  | 1.0(ref.) | 0.88(0.61-1.26) | 0.48 |  | 27.2 | 72.8 | 1.0(ref.) | 0.88(0.57-1.34) | 0.54 |
| ESR1 | rs3020314 | 67.4 | 32.6 |  | 64.1 | 35.9 | 1.0(ref.) | 1.49(0.56-3.99) | 0.42 |  | 65.9 | 34.1 | 1.0(ref.) | 1.19(0.85-1.66) | 0.31 |  | 1.0(ref.) | 1.19(0.85-1.66) | 0.30 |  | 65.2 | 34.8 | 1.0(ref.) | 1.13(0.76-1.69) | 0.53 |
| ESR1 | rs3020377 | 67.2 | 32.8 |  | 64.1 | 35.9 | 1.0(ref.) | 1.49(0.56-3.99) | 0.42 |  | 65.6 | 34.4 | 1.0(ref.) | 1.20(0.86-1.67) | 0.29 |  | 1.0(ref.) | 1.20(0.86-1.67) | 0.28 |  | 65.1 | 35.0 | 1.0(ref.) | 1.12(0.76-1.67) | 0.57 |
| ESR1 | rs3020390 | 42.6 | 57.4 |  | 42.2 | 57.8 | 1.0(ref.) | 1.71(0.66-4.46) | 0.27 |  | 43.6 | 56.4 | 1.0(ref.) | 1.07(0.78-1.46) | 0.69 |  | 1.0(ref.) | 1.07(0.79-1.47) | 0.65 |  | 46.5 | 53.6 | 1.0(ref.) | 0.90(0.62-1.30) | 0.56 |
| ESR1 | rs3020317 | 29.5 | 70.5 |  | 31.3 | 68.8 | 1.0(ref.) | 0.39(0.15-1.05) | 0.06 |  | 29.4 | 70.6 | 1.0(ref.) | 1.04(0.74-1.47) | 0.81 |  | 1.0(ref.) | 1.02(0.73-1.44) | 0.89 |  | 33.6 | 66.5 | 1.0(ref.) | 0.97(0.65-1.44) | 0.88 |
| ESR1 | rs3020394 | 40.5 | 59.5 |  | 42.2 | 57.8 | 1.0(ref.) | 1.61(0.62-4.23) | 0.33 |  | 41.5 | 58.6 | 1.0(ref.) | 1.11(0.81-1.52) | 0.52 |  | 1.0(ref.) | 1.12(0.82-1.53) | 0.49 |  | 44.2 | 55.8 | 1.0(ref.) | 0.84(0.58-1.23) | 0.37 |
| ESR1 | rs3020396 | 38.8 | 61.2 |  | 42.2 | 57.8 | 1.0(ref.) | 1.60(0.61-4.20) | 0.34 |  | 40.4 | 59.7 | 1.0(ref.) | 1.07(0.77-1.47) | 0.69 |  | 1.0(ref.) | 1.07(0.78-1.47) | 0.66 |  | 42.7 | 57.3 | 1.0(ref.) | 0.82(0.56-1.19) | 0.29 |
| ESR1 | rs3020401 | 38.8 | 61.2 |  | 42.2 | 57.8 | 1.0(ref.) | 1.60(0.61-4.21) | 0.34 |  | 40.1 | 59.9 | 1.0(ref.) | 1.09(0.79-1.50) | 0.61 |  | 1.0(ref.) | 1.09(0.80-1.50) | 0.58 |  | 42.7 | 57.3 | 1.0(ref.) | 0.82(0.56-1.20) | 0.31 |
| ESR1 | rs1884051 | 27.7 | 72.3 |  | 34.4 | 65.6 | 1.0(ref.) | 1.10(0.41-2.98) | 0.84 |  | 30.5 | 69.5 | 1.0(ref.) | 0.97(0.69-1.36) | 0.85 |  | 1.0(ref.) | 0.97(0.69-1.36) | 0.86 |  | 31.3 | 68.7 | 1.0(ref.) | 0.71(0.48-1.07) | 0.10 |
| ESR1 | rs1884054 | 50.8 | 49.2 |  | 59.4 | 40.6 | 1.0(ref.) | 1.04(0.40-2.68) | 0.94 |  | 52.9 | 47.2 | 1.0(ref.) | 1.01(0.74-1.38) | 0.96 |  | 1.0(ref.) | 1.01(0.74-1.38) | 0.95 |  | 50.8 | 49.2 | 1.0(ref.) | 1.07(0.74-1.54) | 0.74 |
| ESR1 | rs3020405 | 50.6 | 49.4 |  | 57.8 | 42.2 | 1.0(ref.) | 1.27(0.49-3.27) | 0.62 |  | 52.6 | 47.4 | 1.0(ref.) | 1.02(0.75-1.39) | 0.90 |  | 1.0(ref.) | 1.03(0.75-1.40) | 0.86 |  | 50.7 | 49.4 | 1.0(ref.) | 1.07(0.74-1.55) | 0.73 |
| ESR1 | rs726282 | 35.1 | 64.9 |  | 34.4 | 65.6 | 1.0(ref.) | 0.58(0.22-1.53) | 0.27 |  | 37.1 | 62.9 | 1.0(ref.) | 0.88(0.63-1.21) | 0.42 |  | 1.0(ref.) | 0.87(0.63-1.20) | 0.38 |  | 36.1 | 63.9 | 1.0(ref.) | 1.11(0.75-1.63) | 0.61 |
| ESR1 | rs3020407 | 47.3 | 52.7 |  | 53.1 | 46.9 | 1.0(ref.) | 2.16(0.82-5.70) | 0.12 |  | 47.4 | 52.6 | 1.0(ref.) | 1.18(0.86-1.61) | 0.30 |  | 1.0(ref.) | 1.20(0.88-1.64) | 0.25 |  | 49.7 | 50.3 | 1.0(ref.) | 0.91(0.63-1.33) | 0.64 |
| ESR1 | rs6905370 | 29.5 | 70.5 |  | 39.1 | 60.9 | 1.0(ref.) | 0.60(0.23-1.58) | 0.30 |  | 31.6 | 68.4 | 1.0(ref.) | 0.90(0.64-1.26) | 0.53 |  | 1.0(ref.) | 0.90(0.64-1.26) | 0.53 |  | 28.2 | 71.8 | 1.0(ref.) | 0.93(0.62-1.41) | 0.73 |
| ESR1 | rs926778 | 38.9 | 61.1 |  | 37.5 | 62.5 | 1.0(ref.) | 1.55(0.58-4.17) | 0.39 |  | 29.2 | 70.8 | 1.0(ref.) | 1.52(1.14-2.11) | 0.01 |  | 1.0(ref.) | 1.51(1.09-2.10) | 0.01 |  | 31.3 | 68.7 | 1.0(ref.) | 1.47(1.00-2.17) | 0.05 |
| ESR1 | rs3020366 | 33.1 | 66.9 |  | 34.4 | 65.6 | 1.0(ref.) | 0.62(0.23-1.62) | 0.33 |  | 31.9 | 68.1 | 1.0(ref.) | 0.93(0.67-1.29) | 0.65 |  | 1.0(ref.) | 0.93(0.67-1.30) | 0.67 |  | 30.0 | 70.0 | 1.0(ref.) | 1.18(0.79-1.77) | 0.42 |
| ESR1 | rs2273206 | 47.4 | 52.6 |  | 44.4 | 55.6 | 1.0(ref.) | 1.50(0.58-3.89) | 0.41 |  | 38.3 | 61.7 | 1.0(ref.) | 1.37(1.00-1.88) | 0.05 |  | 1.0(ref.) | 1.36(1.00-1.86) | 0.05 |  | 41.6 | 58.4 | 1.0(ref.) | 1.40(0.96-2.04) | 0.08 |
| ESR1 | rs750686 | 29.2 | 70.8 |  | 26.6 | 73.4 | 1.0(ref.) | 0.98(0.35-2.75) | 0.97 |  | 31.0 | 69.0 | 1.0(ref.) | 0.86(0.62-1.21) | 0.40 |  | 1.0(ref.) | 0.88(0.63-1.23) | 0.44 |  | 28.7 | 71.3 | 1.0(ref.) | 0.87(0.58-1.32) | 0.51 |
| ESR1 | rs2228480 | 58.7 | 41.3 |  | 64.1 | 35.9 | 1.0(ref.) | 0.74(0.29-1.89) | 0.53 |  | 65.0 | 35.0 | 1.0(ref.) | 0.78(0.57-1.08) | 0.13 |  | 1.0(ref.) | 0.79(0.57-1.09) | 0.14 |  | 64.1 | 35.9 | 1.0(ref.) | 0.80(0.55-1.18) | 0.26 |
| ESR1 | rs3798577 | 33.3 | 66.7 |  | 54.7 | 45.3 | 1.0(ref.) | 0.31(0.12-0.81) | 0.02 |  | 41.9 | 58.1 | 1.0(ref.) | 0.74(0.54-1.02) | 0.07 |  | 1.0(ref.) | 0.73(0.53-1.01) | 0.05 |  | 36.1 | 63.9 | 1.0(ref.) | 0.82(0.56-1.20) | 0.31 |
| ESR1 | rs910416 | 37.0 | 63.1 |  | 51.6 | 48.4 | 1.0(ref.) | 0.42(0.16-1.07) | 0.07 |  | 39.3 | 60.8 | 1.0(ref.) | 0.97(0.70-1.34) | 0.83 |  | 1.0(ref.) | 0.94(0.68-1.30) | 0.72 |  | 39.8 | 60.2 | 1.0(ref.) | 0.80(0.55-1.17) | 0.25 |
| ESR2 | rs1255998 | 32.6 | 67.4 |  | 32.8 | 67.2 | 1.0(ref.) | 0.54(0.21-1.37) | 0.19 |  | 28.3 | 71.7 | 1.0(ref.) | 1.22(0.87-1.71) | 0.25 |  | 1.0(ref.) | 1.19(0.85-1.66) | 0.31 |  | 30.3 | 69.7 | 1.0(ref.) | 1.25(0.84-1.87) | 0.27 |
| ESR2 | rs8018687 | 83.5 | 16.5 |  | 84.1 | 15.9 | 1.0(ref.) | 0.15(0.02-0.94) | 0.04 |  | 82.6 | 17.4 | 1.0(ref.) | 1.02(0.68-1.55) | 0.91 |  | 1.0(ref.) | 0.99(0.66-1.50) | 0.97 |  | 83.7 | 16.3 | 1.0(ref.) | 1.20(0.71-2.02) | 0.50 |
| ESR2 | rs928554 | 40.3 | 59.7 |  | 35.9 | 64.1 | 1.0(ref.) | 3.13(1.03-9.57) | 0.05 |  | 45.0 | 55.0 | 1.0(ref.) | 0.85(0.62-1.17) | 0.31 |  | 1.0(ref.) | 0.88(0.64-1.20) | 0.40 |  | 35.8 | 64.2 | 1.0(ref.) | 1.34(0.91-1.97) | 0.13 |
| ESR2 | rs1152579 | 40.8 | 59.2 |  | 35.9 | 64.1 | 1.0(ref.) | 3.14(1.03-9.59) | 0.04 |  | 45.2 | 54.8 | 1.0(ref.) | 0.86(0.63-1.18) | 0.35 |  | 1.0(ref.) | 0.88(0.65-1.21) | 0.44 |  | 36.8 | 63.2 | 1.0(ref.) | 1.35(0.92-1.98) | 0.12 |
| ESR2 | rs1256049 | 52.1 | 48.0 |  | 53.1 | 46.9 | 1.0(ref.) | 0.96(0.39-2.42) | 0.94 |  | 48.0 | 52.0 | 1.0(ref.) | 1.29(0.94-1.76) | 0.11 |  | 1.0(ref.) | 1.28(0.93-1.74) | 0.12 |  | 53.7 | 46.3 | 1.0(ref.) | 0.96(0.66-1.39) | 0.83 |
| ESR2 | rs1256030 | 39.0 | 61.0 |  | 31.3 | 68.8 | 1.0(ref.) | 3.31(1.06-10.4) | 0.04 |  | 42.8 | 57.2 | 1.0(ref.) | 0.90(0.66-1.23) | 0.51 |  | 1.0(ref.) | 0.92(0.67-1.27) | 0.61 |  | 33.9 | 66.1 | 1.0(ref.) | 1.38(0.93-2.03) | 0.11 |
| ESR2 | rs1271572 | 37.9 | 62.1 |  | 31.8 | 68.3 | 1.0(ref.) | 3.28(1.06-10.2) | 0.04 |  | 40.5 | 59.5 | 1.0(ref.) | 0.96(0.70-1.32) | 0.80 |  | 1.0(ref.) | 0.98(0.71-1.35) | 0.91 |  | 34.5 | 65.5 | 1.0(ref.) | 1.28(0.86-1.89) | 0.22 |
| CYP1A1 | rs1048943 | 63.1 | 36.9 |  | 59.4 | 40.6 | 1.0(ref.) | 1.52(0.59-3.90) | 0.38 |  | 60.5 | 39.5 | 1.0(ref.) | 1.17(0.84-1.61) | 0.35 |  | 1.0(ref.) | 1.17(0.85-1.61) | 0.33 |  | 55.5 | 44.5 | 1.0(ref.) | 1.51(1.03-2.20) | 0.03 |
| CYP1B1 | rs1800440 | 99.5 | 0.5 |  | 100.0 | 0.0 | 1.0(ref.) | - | 0.99 |  | 99.1 | 0.9 | 1.0(ref.) | 1.38(0.22-8.69) | 0.73 |  | 1.0(ref.) | 1.35(0.21-8.60) | 0.74 |  | 98.7 | 1.3 | 1.0(ref.) | 2.00(0.31-13.0) | 0.47 |
| CYP1B1 | rs1056836 | 79.7 | 20.3 |  | 78.1 | 21.9 | 1.0(ref.) | 2.01(0.63-6.44) | 0.24 |  | 78.1 | 21.9 | 1.0(ref.) | 1.20(0.82-1.76) | 0.34 |  | 1.0(ref.) | 1.21(0.83-1.77) | 0.32 |  | 74.8 | 25.2 | 1.0(ref.) | 0.85(0.55-1.31) | 0.46 |
| COMT | rs4680 | 45.6 | 54.4 |  | 69.8 | 30.2 | 1.0(ref.) | 0.59(0.22-1.57) | 0.29 |  | 50.8 | 49.2 | 1.0(ref.) | 0.84(0.62-1.15) | 0.29 |  | 1.0(ref.) | 0.84(0.61-1.14) | 0.26 |  | 48.9 | 51.1 | 1.0(ref.) | 0.83(0.57-1.20) | 0.31 |
| 1AA indicates homozygous genotype for reference allele; AB, heterozygote genotype; and BB, homozygous genotype for nonreference allele | | | | | | | | | | | | | | | | | | | | | | | | | |
| 2Adjusted for BMI, age at menarche, and age of first parturition | | | | | | | | | | | | | | | | | | | | | | | | | |
| 3ESR: estrogen receptor   | Supplementary Table 2. Genetic polymorphisms of estrogen metabolizing enzymes and estrogen receptor genes according to subtypes | | | | | | | | | | | | | | | | | | | | | | | | | | | --- | --- | --- | --- | --- | --- | --- | --- | --- | --- | --- | --- | --- | --- | --- | --- | --- | --- | --- | --- | --- | --- | --- | --- | --- | --- | | Gene | rs # | Control | |  | Luminal A1 | | | |  | Luminal B1 | | | |  | HER2-overexpressing1 | | | |  | Triple-negative1 | | | | |  | | AA2 | AB+BB2 |  | AA2 | AB+BB2 | AA2 | AB+BB2 | *p* value | AA2 | AB+BB2 | AA2 | AB+BB2 | *p* value | AA2 | AB+BB2 | AA2 | AB+BB2 | *p* value | AA2 | AB+BB2 | AA2 | AB+BB2 | | *p* value | | % | |  | % | | OR (CI 95%)3 | |  | % | | OR (CI 95%)3 | |  | % | | OR (CI 95%)3 | |  | % | | OR (CI 95%)2 | |  | | | ESR14 | rs851984 | 77.7 | 22.3 |  | 77.7 | 22.3 | 1.0(ref.) | 0.93(0.66-1.33) | 0.69 | 81.3 | 18.8 | 1.0(ref.) | 0.79(0.46-1.36) | 0.39 | 77.4 | 22.6 | 1.0(ref.) | 0.99(0.59-1.65) | 0.96 | 78.8 | 21.2 | 1.0(ref.) | 0.89(0.54-1.50) | | 0.67 | | ESR1 | rs851982 | 77.2 | 22.8 |  | 77.8 | 22.3 | 1.0(ref.) | 0.90(0.63-1.28) | 0.54 | 81.3 | 18.8 | 1.0(ref.) | 0.77(0.45-1.31) | 0.33 | 77.4 | 22.6 | 1.0(ref.) | 0.96(0.58-1.59) | 0.86 | 78.8 | 21.2 | 1.0(ref.) | 0.86(0.52-1.44) | | 0.57 | | ESR1 | rs2881766 | 36.7 | 63.3 |  | 30.4 | 69.6 | 1.0(ref.) | 1.41(1.03-1.93) | 0.03 | 35.9 | 64.1 | 1.0(ref.) | 1.07(0.68-1.67) | 0.78 | 26.6 | 73.4 | 1.0(ref.) | 1.70(1.05-2.75) | 0.02 | 26.5 | 73.5 | 1.0(ref.) | 1.67(1.05-2.67) | | 0.03 | | ESR1 | rs2077647 | 44.1 | 55.9 |  | 37.3 | 62.7 | 1.0(ref.) | 1.43(1.06-1.93) | 0.02 | 40.6 | 59.4 | 1.0(ref.) | 1.14(0.73-1.77) | 0.55 | 37.1 | 62.9 | 1.0(ref.) | 1.57(1.01-2.46) | 0.04 | 40.2 | 59.9 | 1.0(ref.) | 1.22(0.79-1.88) | | 0.36 | | ESR1 | rs9322331 | 96.2 | 3.9 |  | 94.6 | 5.4 | 1.0(ref.) | 1.27(0.63-2.55) | 0.50 | 93.8 | 6.3 | 1.0(ref.) | 1.25(0.47-3.35) | 0.65 | 96.0 | 4.0 | 1.0(ref.) | 0.94(0.33-2.68) | 0.90 | 96.2 | 3.8 | 1.0(ref.) | 0.87(0.30-2.51) | | 0.79 | | ESR1 | rs712221 | 33.1 | 66.9 |  | 29.2 | 70.8 | 1.0(ref.) | 1.20(0.87-1.64) | 0.26 | 26.6 | 73.4 | 1.0(ref.) | 1.27(0.79-2.04) | 0.32 | 28.2 | 71.8 | 1.0(ref.) | 1.50(0.92-2.44) | 0.10 | 38.6 | 61.4 | 1.0(ref.) | 0.78(0.50-1.21) | | 0.25 | | ESR1 | rs1801132 | 24.4 | 75.6 |  | 26.4 | 73.7 | 1.0(ref.) | 0.84(0.59-1.18) | 0.30 | 25.8 | 74.2 | 1.0(ref.) | 1.00(0.60-1.67) | 0.99 | 25.8 | 74.2 | 1.0(ref.) | 0.89(0.54-1.46) | 0.64 | 25.8 | 74.2 | 1.0(ref.) | 0.87(0.53-1.41) | | 0.56 | | ESR1 | rs3020314 | 67.4 | 32.6 |  | 65.3 | 34.7 | 1.0(ref.) | 1.17(0.85-1.61) | 0.33 | 63.3 | 36.7 | 1.0(ref.) | 1.26(0.80-1.99) | 0.32 | 65.3 | 34.7 | 1.0(ref.) | 1.23(0.79-1.94) | 0.36 | 68.9 | 31.1 | 1.0(ref.) | 0.92(0.58-1.46) | | 0.72 | | ESR1 | rs3020377 | 67.2 | 32.8 |  | 65.5 | 34.5 | 1.0(ref.) | 1.16(0.84-1.59) | 0.36 | 62.5 | 37.5 | 1.0(ref.) | 1.26(0.80-1.99) | 0.32 | 64.5 | 35.5 | 1.0(ref.) | 1.23(0.79-1.94) | 0.36 | 68.2 | 31.8 | 1.0(ref.) | 0.96(0.61-1.52) | | 0.86 | | ESR1 | rs3020390 | 42.6 | 57.4 |  | 43.8 | 56.2 | 1.0(ref.) | 1.03(0.76-1.38) | 0.86 | 45.3 | 54.7 | 1.0(ref.) | 0.92(0.60-1.42) | 0.70 | 43.6 | 56.5 | 1.0(ref.) | 1.00(0.65-1.55) | 0.99 | 47.7 | 52.3 | 1.0(ref.) | 0.82(0.54-1.26) | | 0.36 | | ESR1 | rs3020317 | 29.5 | 70.5 |  | 31.5 | 68.5 | 1.0(ref.) | 0.93(0.68-1.29) | 0.66 | 28.1 | 71.9 | 1.0(ref.) | 1.16(0.71-1.88) | 0.55 | 33.1 | 66.9 | 1.0(ref.) | 0.94(0.59-1.49) | 0.78 | 31.1 | 68.9 | 1.0(ref.) | 0.98(0.62-1.56) | | 0.93 | | ESR1 | rs3020394 | 40.5 | 59.5 |  | 41.4 | 58.7 | 1.0(ref.) | 1.05(0.77-1.41) | 0.77 | 44.5 | 55.5 | 1.0(ref.) | 0.88(0.57-1.35) | 0.54 | 41.1 | 58.9 | 1.0(ref.) | 0.98(0.64-1.52) | 0.93 | 46.2 | 53.8 | 1.0(ref.) | 0.81(0.53-1.24) | | 0.32 | | ESR1 | rs3020396 | 38.8 | 61.2 |  | 40.1 | 59.9 | 1.0(ref.) | 1.02(0.75-1.38) | 0.91 | 42.2 | 57.8 | 1.0(ref.) | 0.83(0.54-1.29) | 0.41 | 41.1 | 58.9 | 1.0(ref.) | 0.89(0.57-1.38) | 0.59 | 45.5 | 54.6 | 1.0(ref.) | 0.76(0.49-1.16) | | 0.20 | | ESR1 | rs3020401 | 38.8 | 61.2 |  | 40.0 | 60.0 | 1.0(ref.) | 1.03(0.76-1.39) | 0.86 | 42.2 | 57.8 | 1.0(ref.) | 0.84(0.54-1.30) | 0.43 | 40.7 | 59.4 | 1.0(ref.) | 0.91(0.59-1.42) | 0.68 | 45.5 | 54.6 | 1.0(ref.) | 0.77(0.50-1.17) | | 0.21 | | ESR1 | rs1884051 | 27.7 | 72.3 |  | 31.7 | 68.3 | 1.0(ref.) | 0.86(0.62-1.19) | 0.37 | 28.9 | 71.1 | 1.0(ref.) | 0.82(0.51-1.31) | 0.40 | 31.5 | 68.6 | 1.0(ref.) | 0.74(0.47-1.19) | 0.21 | 31.1 | 68.9 | 1.0(ref.) | 0.80(0.51-1.27) | | 0.35 | | ESR1 | rs1884054 | 50.8 | 49.2 |  | 52.6 | 47.4 | 1.0(ref.) | 1.03(0.76-1.38) | 0.86 | 51.6 | 48.4 | 1.0(ref.) | 0.99(0.64-1.52) | 0.94 | 49.6 | 50.4 | 1.0(ref.) | 1.06(0.69-1.64) | 0.77 | 56.8 | 43.2 | 1.0(ref.) | 0.81(0.52-1.24) | | 0.32 | | ESR1 | rs3020405 | 50.6 | 49.4 |  | 52.4 | 47.6 | 1.0(ref.) | 1.04(0.77-1.40) | 0.80 | 50.8 | 49.2 | 1.0(ref.) | 1.03(0.67-1.60) | 0.87 | 50.0 | 50.0 | 1.0(ref.) | 1.06(0.69-1.63) | 0.80 | 56.1 | 43.9 | 1.0(ref.) | 0.84(0.55-1.28) | | 0.41 | | ESR1 | rs726282 | 35.1 | 64.9 |  | 37.5 | 62.5 | 1.0(ref.) | 0.89(0.66-1.22) | 0.47 | 31.3 | 68.8 | 1.0(ref.) | 1.28(0.80-2.04) | 0.30 | 41.9 | 58.1 | 1.0(ref.) | 0.81(0.52-1.25) | 0.34 | 33.3 | 66.7 | 1.0(ref.) | 1.10(0.70-1.72) | | 0.68 | | ESR1 | rs3020407 | 47.3 | 52.7 |  | 49.7 | 50.3 | 1.0(ref.) | 1.02(0.76-1.37) | 0.90 | 46.1 | 53.9 | 1.0(ref.) | 1.12(0.72-1.73) | 0.62 | 45.2 | 54.8 | 1.0(ref.) | 1.14(0.74-1.76) | 0.54 | 51.5 | 48.5 | 1.0(ref.) | 0.90(0.59-1.38) | | 0.62 | | ESR1 | rs6905370 | 29.5 | 70.5 |  | 33.3 | 66.7 | 1.0(ref.) | 0.78(0.56-1.07) | 0.12 | 31.3 | 68.8 | 1.0(ref.) | 0.92(0.57-1.49) | 0.74 | 30.1 | 69.9 | 1.0(ref.) | 0.82(0.51-1.32) | 0.41 | 23.5 | 76.5 | 1.0(ref.) | 1.18(0.72-1.92) | | 0.51 | | ESR1 | rs926778 | 38.9 | 61.1 |  | 27.8 | 72.2 | 1.0(ref.) | 1.86(1.35-2.56) | 0.0001 | 34.7 | 65.4 | 1.0(ref.) | 1.22(0.78-1.92) | 0.39 | 37.1 | 62.9 | 1.0(ref.) | 1.26(0.80-1.96) | 0.31 | 30.3 | 69.7 | 1.0(ref.) | 1.57(1.00-2.48) | | 0.05 | | ESR1 | rs3020366 | 33.1 | 66.9 |  | 34.8 | 65.2 | 1.0(ref.) | 0.82(0.60-1.13) | 0.22 | 26.6 | 73.4 | 1.0(ref.) | 1.19(0.74-1.93) | 0.47 | 29.8 | 70.2 | 1.0(ref.) | 1.04(0.65-1.66) | 0.86 | 26.0 | 74.1 | 1.0(ref.) | 1.18(0.73-1.89) | | 0.49 | | ESR1 | rs2273206 | 47.4 | 52.6 |  | 37.6 | 62.4 | 1.0(ref.) | 1.61(1.19-2.17) | 0.002 | 42.2 | 57.8 | 1.0(ref.) | 1.16(0.75-1.80) | 0.49 | 48.8 | 51.2 | 1.0(ref.) | 1.02(0.66-1.57) | 0.93 | 38.2 | 61.8 | 1.0(ref.) | 1.51(0.98-2.34) | | 0.06 | | ESR1 | rs750686 | 29.2 | 70.8 |  | 32.8 | 67.2 | 1.0(ref.) | 0.72(0.52-0.99) | 0.04 | 28.4 | 71.7 | 1.0(ref.) | 1.00(0.61-1.63) | 0.99 | 27.4 | 72.6 | 1.0(ref.) | 0.94(0.58-1.53) | 0.80 | 23.5 | 76.5 | 1.0(ref.) | 1.13(0.69-1.84) | | 0.62 | | ESR1 | rs2228480 | 58.7 | 41.3 |  | 62.6 | 37.4 | 1.0(ref.) | 0.89(0.65-1.20) | 0.43 | 69.5 | 30.5 | 1.0(ref.) | 0.61(0.38-0.97) | 0.03 | 60.7 | 39.3 | 1.0(ref.) | 1.00(0.64-1.56) | 0.99 | 70.5 | 29.6 | 1.0(ref.) | 0.64(0.40-1.00) | | 0.05 | | ESR1 | rs3798577 | 33.3 | 66.7 |  | 36.9 | 63.2 | 1.0(ref.) | 0.91(0.67-1.24) | 0.54 | 50.8 | 49.2 | 1.0(ref.) | 0.50(0.32-0.78) | 0.002 | 37.1 | 62.9 | 1.0(ref.) | 0.85(0.54-1.33) | 0.48 | 47.7 | 52.3 | 1.0(ref.) | 0.58(0.38-0.90) | | 0.01 | | ESR1 | rs910416 | 37.0 | 63.1 |  | 36.9 | 63.2 | 1.0(ref.) | 1.06(0.78-1.44) | 0.73 | 48.0 | 52.0 | 1.0(ref.) | 0.62(0.40-0.96) | 0.03 | 41.9 | 58.1 | 1.0(ref.) | 0.80(0.52-1.24) | 0.31 | 43.2 | 56.8 | 1.0(ref.) | 0.82(0.53-1.27) | | 0.37 | | ESR2 | rs1255998 | 32.6 | 67.4 |  | 29.7 | 70.3 | 1.0(ref.) | 1.18(0.86-1.63) | 0.30 | 26.6 | 73.4 | 1.0(ref.) | 1.27(0.79-2.05) | 0.32 | 29.0 | 71.0 | 1.0(ref.) | 1.26(0.79-2.02) | 0.33 | 31.1 | 68.9 | 1.0(ref.) | 1.05(0.67-1.65) | | 0.84 | | ESR2 | rs8018687 | 83.5 | 16.5 |  | 82.5 | 17.5 | 1.0(ref.) | 1.16(0.78-1.73) | 0.45 | 86.6 | 13.4 | 1.0(ref.) | 0.62(0.32-1.22) | 0.16 | 82.3 | 17.7 | 1.0(ref.) | 1.15(0.64-2.05) | 0.63 | 82.4 | 17.6 | 1.0(ref.) | 1.06(0.59-1.89) | | 0.84 | | ESR2 | rs928554 | 40.3 | 59.7 |  | 42.7 | 57.3 | 1.0(ref.) | 0.94(0.69-1.27) | 0.67 | 33.6 | 66.4 | 1.0(ref.) | 1.63(1.02-2.60) | 0.03 | 43.6 | 56.5 | 1.0(ref.) | 0.94(0.61-1.45) | 0.77 | 38.6 | 61.4 | 1.0(ref.) | 1.15(0.75-1.79) | | 0.52 | | ESR2 | rs1152579 | 40.8 | 59.2 |  | 42.9 | 57.1 | 1.0(ref.) | 0.95(0.70-1.28) | 0.72 | 33.6 | 66.4 | 1.0(ref.) | 1.66(1.04-2.65) | 0.03 | 44.4 | 55.7 | 1.0(ref.) | 0.93(0.60-1.44) | 0.73 | 40.2 | 59.9 | 1.0(ref.) | 1.11(0.72-1.72) | | 0.62 | | ESR2 | rs1256049 | 52.1 | 48.0 |  | 50.0 | 50.0 | 1.0(ref.) | 1.15(0.85-1.55) | 0.36 | 45.3 | 54.7 | 1.0(ref.) | 1.28(0.83-1.98) | 0.26 | 58.1 | 41.9 | 1.0(ref.) | 0.79(0.51-1.22) | 0.28 | 50.0 | 50.0 | 1.0(ref.) | 1.11(0.72-1.70) | | 0.63 | | ESR2 | rs1256030 | 39.0 | 61.0 |  | 40.7 | 59.3 | 1.0(ref.) | 0.95(0.70-1.28) | 0.73 | 33.6 | 66.4 | 1.0(ref.) | 1.53(0.96-2.45) | 0.07 | 38.7 | 61.3 | 1.0(ref.) | 1.07(0.69-1.66) | 0.77 | 35.6 | 64.4 | 1.0(ref.) | 1.26(0.81-1.96) | | 0.31 | | ESR2 | rs1271572 | 37.9 | 62.1 |  | 39.0 | 61.0 | 1.0(ref.) | 0.98(0.72-1.33) | 0.90 | 34.4 | 65.6 | 1.0(ref.) | 1.49(0.93-2.38) | 0.09 | 38.2 | 61.8 | 1.0(ref.) | 1.05(0.67-1.65) | 0.81 | 34.9 | 65.2 | 1.0(ref.) | 1.27(0.81-1.99) | | 0.30 | | CYP1A1 | rs1048943 | 63.1 | 36.9 |  | 59.8 | 40.2 | 1.0(ref.) | 1.24(0.91-1.69) | 0.16 | 59.4 | 40.6 | 1.0(ref.) | 1.19(0.76-1.86) | 0.43 | 59.7 | 40.3 | 1.0(ref.) | 1.15(0.74-1.80) | 0.53 | 53.0 | 47.0 | 1.0(ref.) | 1.65(1.08-2.54) | | 0.02 | | CYP1B1 | rs1800440 | 99.5 | 0.5 |  | 99.8 | 0.2 | 1.0(ref.) | 0.50(0.04-5.66) | 0.57 | 97.7 | 2.3 | 1.0(ref.) | 3.43(0.47-24.8) | 0.22 | 98.4 | 1.6 | 1.0(ref.) | 2.99(0.41-22.0) | 0.28 | 98.5 | 1.5 | 1.0(ref.) | 2.69(0.35-20.5) | | 0.34 | | CYP1B1 | rs1056836 | 79.7 | 20.3 |  | 79.1 | 20.9 | 1.0(ref.) | 0.95(0.66-1.37) | 0.77 | 78.1 | 21.9 | 1.0(ref.) | 1.17(0.70-1.96) | 0.55 | 72.6 | 27.4 | 1.0(ref.) | 1.17(0.71-1.94) | 0.54 | 72.0 | 28.0 | 1.0(ref.) | 1.41(0.86-2.31) | | 0.17 | | COMT | rs4680 | 45.6 | 54.4 |  | 51.7 | 48.3 | 1.0(ref.) | 0.81(0.60-1.09) | 0.15 | 50.4 | 49.6 | 1.0(ref.) | 0.78(0.50-1.21) | 0.26 | 50.0 | 50.0 | 1.0(ref.) | 0.78(0.50-1.20) | 0.25 | 53.0 | 47.0 | 1.0(ref.) | 0.73(0.48-1.13) | | 0.15 | | 1Luminal A: ER+ and/or PR+/HER2-, Luminal B: HR+ and/or PR+/HER2+, HER2-overexpressing: ER-/PR-/HER2+, Triple negative: ER-/PR-/HER2- | | | | | | | | | | | | | | | | | | | | | | | | | | | 2AA indicates homozygous genotype for reference allele; AB, heterozygote genotype; and BB, homozygous genotype for nonreference allele | | | | | | | | | | | | | | | | | | | | | | | | | | | 3Adjusted for BMI, age at menarche, and age of first parturition | | | | | | | | | | | | | | | | | | | | | | | | | | | 4ESR: estrogen receptor | | | | | | | | | | | | | | | | | | | | | | | | | | |  | | | | | | | | | | | | | | | | | | | | | | | | | | | | | | | | | | | | | | | | | | | | | | | | | | | |
